# Supplementary material
Source: PubMed Central journal article supplement (PMC3021452)
Supplement: supp_jn.110.126870_nut126870_F01.pdf [file supp_jn.110.126870_nut126870_F01.pdf]

Online Supporting Material

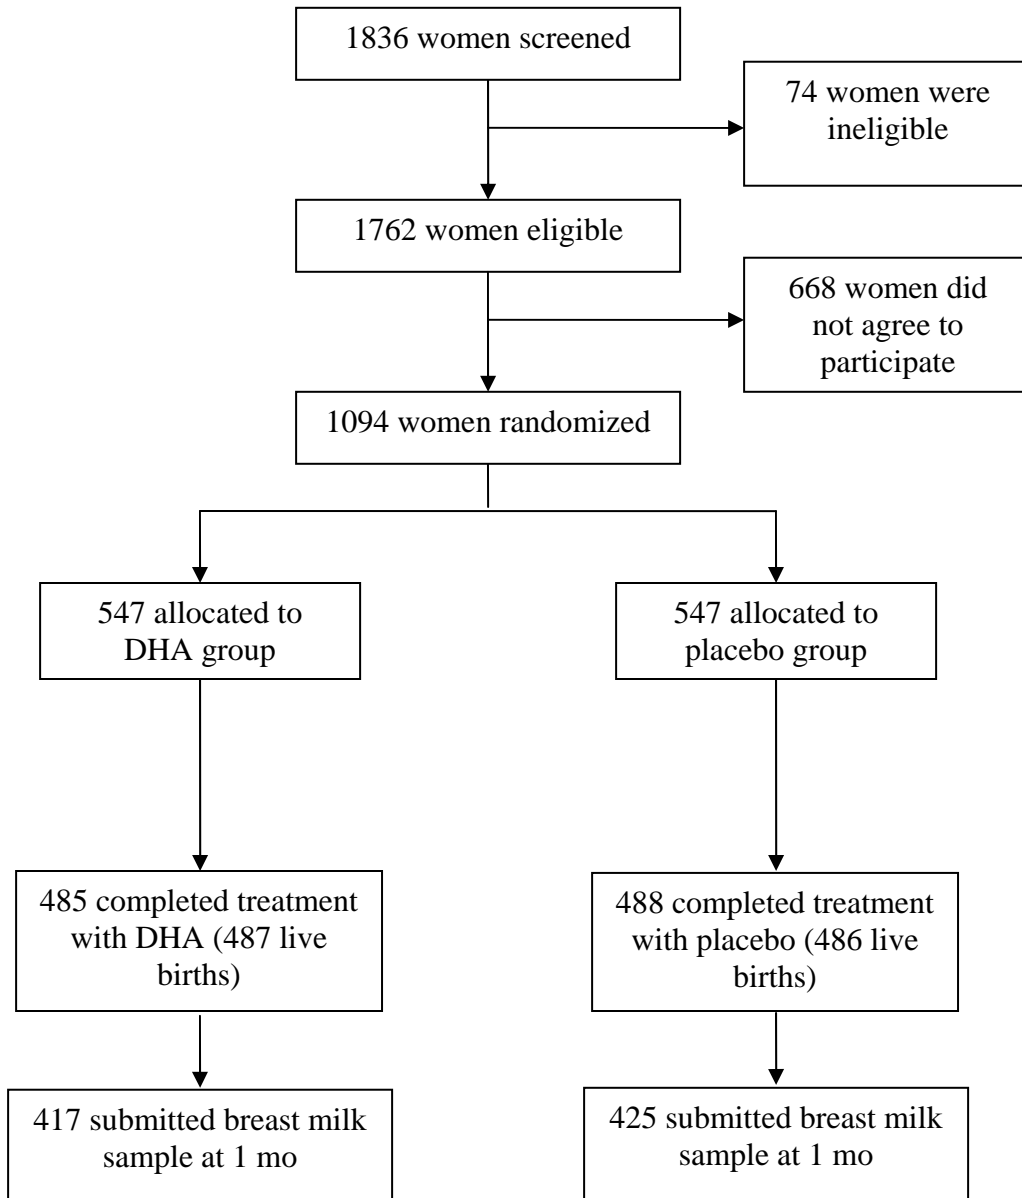

Supplemental Figure 1

Trial profile describing recruitment and follow-up.
